# Severe Inbreeding and Small Effective Number of Breeders in a Formerly Abundant Marine Fish

Shannon J. O'Leary<sup>1\*</sup>, Lyndie A. Hice<sup>1</sup>, Kevin A. Feldheim<sup>2</sup>, Michael G. Frisk<sup>1</sup>, Anne E. McElroy<sup>1</sup>, Mark D. Fast<sup>1,3</sup>, Demian D. Chapman<sup>1,4</sup>

**1** School of Marine and Atmospheric Science, Stony Brook University, Stony Brook, New York, United States of America, **2** Pritzker Laboratory for Molecular Systematics and Evolution, The Field Museum, Chicago, Illinois, United States of America, **3** Atlantic Veterinary College, University of Prince Edward Island, Charlottetown, Canada, **4** Institute of Ocean Conservation Science, Stony Brook, New York, United States of America

## Abstract

In contrast to freshwater fish it is presumed that marine fish are unlikely to spawn with close relatives due to the dilution effect of large breeding populations and their propensity for movement and reproductive mixing. Inbreeding is therefore not typically a focal concern of marine fish management. We measured the effective number of breeders in 6 New York estuaries for winter flounder (*Pseudopleuronectes americanus*), a formerly abundant fish, using 11 microsatellite markers (6–56 alleles per locus). The effective number of breeders for 1–2 years was remarkably small, with point estimates ranging from 65–289 individuals. Excess homozygosity was detected at 10 loci in all bays ( $F_{IS} = 0.169–0.283$ ) and individuals exhibited high average internal relatedness (IR; mean = 0.226). These both indicate that inbreeding is very common in all bays, after testing for and ruling out alternative explanations such as technical and sampling artifacts. This study demonstrates that even historically common marine fish can be prone to inbreeding, a factor that should be considered in fisheries management and conservation plans.

**Citation:** O'Leary SJ, Hice LA, Feldheim KA, Frisk MG, McElroy AE, et al. (2013) Severe Inbreeding and Small Effective Number of Breeders in a Formerly Abundant Marine Fish. PLoS ONE 8(6): e66126. doi:10.1371/journal.pone.0066126

**Editor:** Adam Stow, Macquarie University, Australia

**Received:** February 12, 2013; **Accepted:** May 1, 2013; **Published:** June 7, 2013

**Copyright:** © 2013 O'Leary et al. This is an open-access article distributed under the terms of the Creative Commons Attribution License, which permits unrestricted use, distribution, and reproduction in any medium, provided the original author and source are credited.

**Funding:** The funders had no role in study design, data collection and analysis, decision to publish, or preparation of the manuscript. Genetic analyses were supported by the Institute for Ocean Conservation Science with operational funds from The Pew Charitable Trusts. Microsatellite amplification was carried out in the Pritzker Laboratory for Molecular Systematics and Evolution operated with support from the Pritzker Foundation. Shinnecock Bay fish were sampled during the Shinnecock Bay Restoration Project, which is funded by the Laurie Landeau Foundation and matched by a gift from the Simons Foundation. Further funding was granted by the Saltonstall-Kennedy Grant Program (NOAA) and a NY DOS grant for field work in Hempstead Bays.

**Competing Interests:** The authors have declared that no competing interests exist.

\* E-mail: shannon.oleary@stonybrook.edu

## Introduction

McNeely et al. [1] defined three levels of biodiversity: ecosystem diversity, species diversity and genetic diversity. While ecosystem diversity describes the differences of habitats and environmental parameters that shape communities, species diversity describes the variety and abundance of organisms inhabiting a certain area and genetic diversity focuses on the combination and variation of genes found within a single population of one species. The conservation of genetic diversity is often not well incorporated into marine fish management [2] despite being the most fundamental level of biodiversity and a key source of variation that enables evolutionary adaptation [3,4]. This stems from the fact that the key processes that reduce genetic diversity, such as inbreeding and stochastic genetic drift, are associated with very small, fragmented populations and are assumed to be diluted in large, well-mixed populations [5,6,7]. Since marine fish are traditionally assumed to exist as large, panmictic populations connected by larval and adult-mediated dispersal [8,9,10] it is not surprising that conservation of genetic diversity is not emphasized in marine fish conservation [2,11].

Recent studies have shown that marine fish populations can be more structured than traditionally thought [12,13,14] and effective population size, which determines how vulnerable populations are to losing genetic diversity due to genetic drift, can be up to five

orders of magnitude smaller than census population sizes in broadcast spawning species that exhibit large variance in reproductive success [12,16,17]. These findings have initiated a paradigm shift that marine fish may be more vulnerable to processes that reduce genetic diversity than previously assumed [17,18], for example through inbreeding, defined in population genetics as a departure from random mating. Hoarau et al. [17] detected heterozygote deficiencies in plaice (*Pleuronectes platessa*) in the North Sea and, after ruling out alternative hypotheses, concluded that inbreeding was responsible for this pattern. Despite having a relatively large census population size, plaice tend to spawn in their natal area and have high variance in reproductive success, increasing the probability that spawning pairs or groups will contain related individuals. Despite this remarkable finding, there have been few follow-up studies of inbreeding in marine fish, even though heterozygote deficiencies have been detected in many other species, including redfin culter (*Culter erythropterus*) [14], anchovy (*Engraulis encrasicolus*) [15], rockfish (*Sebastes melanops*) [19] and whitefish (*Coregonus lavaretus*) [20]. It is therefore difficult to determine whether inbreeding in plaice is an anomaly or a process that should be of broader conservation concern for heavily exploited marine fish.

The winter flounder (*Pseudopleuronectes americanus*) is a demersal flatfish that was once very common in the inshore bays and estuaries of the Northwest Atlantic and supported very large

commercial and recreational fisheries [21,22]. The species' geographic range encompasses the North American coast from Labrador to Georgia [23]. Spawning migrations occur in the winter and spring months and there are four broadly defined and genetically discrete spawning stocks across the species range: Sable Island Bank, St. Mary's Bank, Browns Bank, and Georges Bank [24]. Winter flounder eggs are demersal and it has been assumed that pre-settlement larvae are mixed through larval dispersal within each stock [25]. However, more recent studies have shown that larvae are likely retained within their natal estuary [26] and a number of authors believe that adults remain within or return to their natal estuaries to spawn [27–31], both of which could promote the development of fine-scale population structure.

Winter flounder began declining in the late 1980s and the age structure of many populations has become truncated, with a low proportion of the remaining fish older than 5 years [22]. Long Island, New York (LI) is a very densely populated region with 2,086 people per km<sup>2</sup>, and has a long history of commercial and recreational exploitation of winter flounder [22]. Commercial [32,33] and recreational [33] (<http://www.st.nmfs.noaa.gov/recreational-fisheries/access-data/run-a-data-query/index>) landings have reached record low levels, and despite management there is little evidence of recovery [22,26,34,35]. In light of the extent of inbreeding observed in North Sea plaice, a fish with many life-history similarities to winter flounder, we tested for inbreeding in winter flounder in LI estuaries. We also tested for genetic differentiation among bays, estimated the effective number of breeders for each bay and tested for genetic bottlenecks, all of which contribute to the rate at which population genetic diversity is lost.

**Methods**

**Ethics statement**

Necessary permits for sampling and handling fish were obtained from responsible agencies and authorities (NY DEC Permit #1030 and 1644 for all bays, Gateway NRA (National Park Service) Permit #GATE-2007-SCI-0021 and GATE-2011-SCI-0014 for Jamaica Bay and a permission from the Town of East Hampton Trustees for Napeague Harbor). All winter flounder were sacrificed by being flash frozen on dry ice in the field as approved in our IACUC protocol (IACUC "Restoring Long Island's Winter Flounder Fishery", IRBNet#: 260837-3).

**Sample collection**

Young-of-the-year (YOY) winter flounder were collected with a 1 m beam trawl every two weeks from June to October in 2010 and May to October in 2011. Samples were collected in 6 bays (Figure 1): Jamaica Bay (40 38' 28.43" N, 73 49' 02.37" W) in 2010 and 2011, Moriches (40 47' 02.47"N, 72 47' 23.14"W) in 2010 and 2011, Hempstead (40 36' 58.85"N, 73 35' 52.81" W) in 2010 and 2011, Shinnecock Bay (40 51' 46.13"N, 72 29' 44.73"W) in 2010 and 2011, Cold Spring Pond (40 53' 59.04"N, 72 27' 40.31"W) in 2010, and Napeague Harbor (41 00' 34.62"N, 72 02' 49.84"W) in 2010. With the exception of Hempstead Bays, trawls within each bay occurred at 10 randomly chosen stations within a grid along a section of coast where winter flounder had previously been caught. Supplementary sampling occurred in 2011 throughout Hempstead Bay using a beam trawl or 3–30 m beach seines due to low abundances of fish in this area. Fin clips were taken from all flounder and stored in 75% reagent grade ethanol at room temperature.

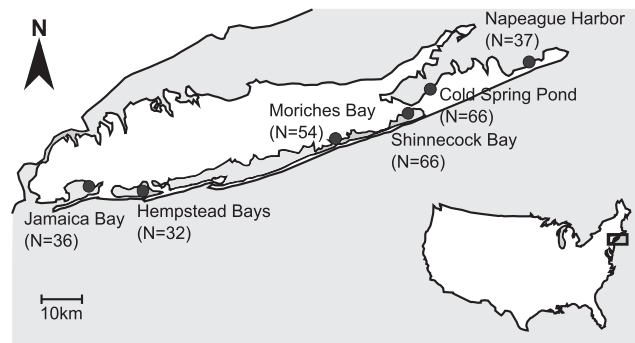

**Figure 1. Sample locations and sample number (N) for 2010–2011.**

doi:10.1371/journal.pone.0066126.g001

**Laboratory analysis**

Genomic DNA was extracted from fin clips (0.015–0.035 mg of tissue) using the Qiagen Blood and Tissue extraction kit (Qiagen, Valencia, CA, USA). Eleven microsatellite loci were amplified using PCR primers that were either used for previous winter flounder microsatellite studies (five loci [24,36]) or recently developed (six loci [37]). The master mix consisted of 1× PCR buffer, 10× bovine serum albumin, 1.5–3.5 mM MgCl<sub>2</sub>, 0.12 mM of each dNTPs, 0.16 μM of the reverse primer and the fluorescently labeled M13 primer and 0.04 μM of the species specific forward primer and 1 unit Taq polymerase in a final reaction volume of 10 μl. Thermal cycling profiles were 4 minutes at 94°C, 30 cycles of 94°C for 15 seconds, primer specific annealing temperature for 15 seconds, 72°C for 45 seconds and 5 cycles of 94°C, 15 seconds at 53°C and 45 seconds at 72°C with a final extension for 10 minutes at 72°C. Locus-specific annealing temperatures (T<sub>a</sub>) are given in Table 1. Amplified products were separated and sized using an internal size standard (LIZ-500 Applied Biosystems) on a Genetic Analyzer (Applied Biosystems ABI3730 sequencer). Alleles were scored by a single analyst (SO) using Peakscanv1.0 (Applied Biosystems). For quality control, a

**Table 1. Genetic diversity for each microsatellite locus over all sample locations described through allelic richness and heterozygosity.**

| Locus      | T <sub>a</sub> | K  | H <sub>e</sub> | H <sub>o</sub> |
|------------|----------------|----|----------------|----------------|
| A441 [38]  | 52             | 17 | 0.688          | 0.862          |
| J42 [38]   | 52             | 19 | 0.764          | 0.844          |
| Pam21 [26] | 46             | 16 | 0.677          | 0.787          |
| Pam27 [26] | 47             | 20 | 0.638          | 0.869          |
| Pam79 [26] | 43             | 38 | 0.564          | 0.956          |
| WF06 [39]  | 45             | 9  | 0.561          | 0.520          |
| WF12 [39]  | 45             | 6  | 0.591          | 0.662          |
| WF16 [39]  | 54             | 26 | 0.616          | 0.803          |
| WF27 [39]  | 56             | 56 | 0.758          | 0.963          |
| WF32 [39]  | 54             | 20 | 0.364          | 0.758          |
| WF33 [39]  | 56             | 48 | 0.689          | 0.954          |

T<sub>a</sub>: Annealing temperatures. K: number of alleles. H<sub>e</sub>: expected heterozygosity. H<sub>o</sub>: observed heterozygosity.

doi:10.1371/journal.pone.0066126.t001

second analyst (KAF) verified the scoring of approximately 30% of heterozygotes and 100% of the homozygotes.

### Testing for technical artifacts

The entire genotypic database was analyzed with MICRO-SATELLITE TOOLKIT FOR EXCEL and MICROCHECKER [38] to check for possible scoring errors, identical genotypes, large allelic dropouts, null alleles and large allelic gaps. Null alleles occur when there is a mutation within the binding site of the primer, causing annealing failure during PCR. If null alleles exist in the population, some individuals will be homozygous for these alleles at a certain locus and will consistently fail to amplify at this locus despite working at others. If null alleles were occurring at high frequencies we would therefore expect chronic issues with gaps within the dataset. To assess this possibility we attempted to re-amplify any samples that failed on the first attempt, making a dedicated effort to obtain a genotype at every locus for all individuals. When null alleles are present a proportion of individuals scored as homozygotes are actually heterozygotes for a null allele. We attempted to reveal these “false” homozygotes by reducing the stringency of the PCR. Following Hoarau et al. [17] a subset of 8 homozygotes for each locus was re-amplified at lower temperatures ( $3^{\circ}\text{C}$  lower than the  $T_a$  listed for each locus in Table 1) to promote the amplification of null alleles, i.e. if null alleles were present we would expect additional alleles to be amplified in an individual previously scored as homozygotes thus revealing a proportion of homozygotes to be false.

### Statistical analysis

Expected and observed heterozygosity [39] and allelic richness were calculated for each sampled estuary using FSTAT [40]. GENEPop [41,42] was used to test for linkage disequilibrium and deviations from Hardy-Weinberg Equilibrium (HWE) using exact tests. We calculated global  $F_{ST}$  to estimate population differentiation and pairwise  $F_{ST}$  to assess genetic differentiation between bays and tested for significance as implemented in FSTAT [40]. The shortest distance by sea between each pair of sample locations was measured using Google Earth V.6.2.2.6613 to assess isolation by distance (IBD). The relationship between genetic similarity ( $M = (1/F_{ST}) - 1/4$ ) [43] and geographic distance was evaluated using Mantel tests [44] as executed in IBDWS [45].

Deviations from HWE can arise from inadvertent grouping of multiple populations into one or from analyzing a large number of related individuals (Wahlund effect). To test for the possibility of genetically distinct groups of winter flounder spawning in the same bay at different times we calculated pairwise  $F_{ST}$  for several temporal groups. We first tested all samples caught in 2010 ( $N = 115$ ) against those caught in 2011 ( $N = 99$ ). We then pooled samples caught in the early sampling season (May–July) and the late sampling season (August–October) and calculated pairwise  $F_{ST}$  for the following four temporal groups: early 2010 ( $N = 89$ ), late 2010 ( $N = 26$ ), early 2011 ( $N = 70$ ) and late 2011 ( $N = 29$ ). The program STRUCTURE [46] was also used to estimate the number of distinct genetic populations in LI by using a Bayesian approach to detect clusters of individuals that would minimize disruptions from HWE within the whole sample set. STRUCTURE was run using the admixture and the non-admixture model both using and not using a priori information regarding the sampling location. We simulated  $K = 2-15$  for 10 independent runs each to determine convergence with a burn-in period of 15,000 Markov chain Monte Carlo (MCMC) steps followed by 350,000 MCMC steps. This approach is capable of detecting if there were strongly differentiated groups ( $F_{ST} > 0.05$ ) [47] spawning in the same bays at

different times that were admixed in the sample we collected. Lastly, we tested the pairwise relatedness of all individuals and calculated the average within group relatedness of individuals at each sample location in order to detect family structure within each sample.

The effective number of breeders ( $N_b$ ) was estimated for each bay and LI using the linkage disequilibrium method as implemented in LDNE [48,49] with the lowest included allele frequency  $p_{crit} = 0.02$ . This method estimates the effective number of breeders based on a single sample by using the small level of linkage of alleles that occurs due to sampling error during recombination. Since we used young-of-the year individuals sampled over 1–2 years, the parameter we estimated is the number of breeders that effectively produced the sampled cohorts, not the effective population size  $N_e$  for the whole generation [50]. Three tests for genetic bottlenecks were implemented for LI as a whole and for each bay: the  $m$ -ratio test [51], the mode shift test [52] and the heterozygote excess test. The last two methods are implemented in the program BOTTLENECK [53].

Three metrics were used to estimate levels of inbreeding. At the sample (i.e., bay) level, the inbreeding coefficient  $F_{IS}$  [54] was used to measure the intrapopulation heterozygosity deficiency resulting from inbreeding when alleles are shared by descent. At the individual fish level, the internal relatedness (IR) was used to measure the relatedness of individual’s parents [55]. For outbred individuals IR should be close to or below zero, whereas individuals derived from consanguineous mating have an IR that is positive (to a maximum of 1), indicating that the parents of that individual shared many alleles and are closely related. We used the program STORM [56] to calculate IR for each individual. We tested for significant difference between the mean IR levels of each bay using a t-test to determine significant differences between sample locations. In addition we calculated the homozygosity levels of individuals using STORM [56], which indicates the proportion of loci within the genotype of an individual that are homozygous.

### Results

Eleven microsatellite loci were amplified in 267 individuals sampled in 6 LI bays (32–66 individuals per bay; Figure 1). Loci had from 6 to 56 alleles (mean = 25, s.d. = 15.8) and observed heterozygosities ranging from 0.364 to 0.764 (Table 1). MICROCHECKER did not detect evidence of stuttering or large allelic drop out at any locus. While MICROCHECKER did suggest the presence of null alleles due to strong deviations from HWE, none of the homozygotes exhibited an additional allele after being re-amplified at lower annealing temperatures ( $N = 8$  homozygotes per locus). All individuals were successfully amplified and genotyped at all loci, indicating that there were no individuals that were homozygous for null alleles (i.e., there were no blanks in the dataset).

The global  $F_{ST}$  was small but significantly different from zero ( $F_{ST} = 0.008$ ;  $p < 0.05$ ). Pairwise  $F_{ST}$  values between bays were consistently significant ( $p < 0.05$ ) for Napeague Harbor (except compared to Hempstead Bay) and Shinnecock Bay (Table 2), though they were no longer significant after Bonferroni correction for multiple comparisons. Analysis of IBD (Figure 2) was also significant, though weak ( $r^2 = 0.0958$ ,  $p < 0.01$ ). Even after removing Napeague Harbor, the most divergent and distant site, the IBD pattern was still significant ( $r^2 = 0.0701$ ,  $p < 0.01$ ). Temporal pairwise  $F_{ST}$  calculated between the years 2010 and 2011 was 0.005 ( $p = 0.4$ ); pairwise  $F_{ST}$ -values for comparison between the early and late sampling season ranged between 0.005 and 0.010 ( $p = 0.3-0.6$ ). Bayesian clustering implemented in

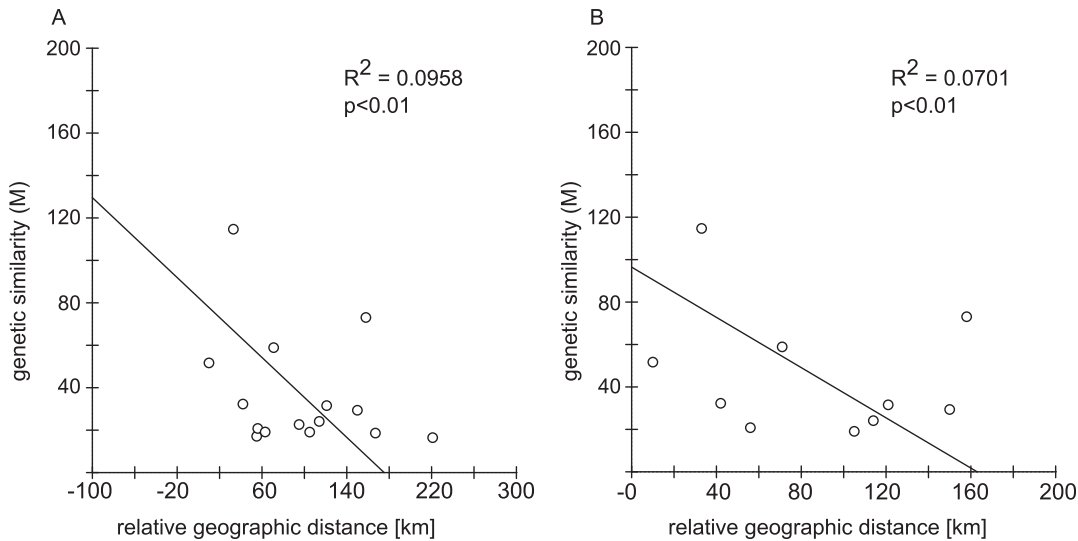

**Figure 2. Isolation by distance.** (2a) Regression of pairwise geographic distance and genetic similarity of all sample populations. (2b) Regression of pairwise geographic distance and genetic similarity of all sample locations excluding Napeague. doi:10.1371/journal.pone.0066126.g002

STRUCTURE failed to detect population structure from  $K = 2-15$  for the entire sample set. Additionally, analysis of pairwise relatedness of all sampled individuals showed that less than 6% were related at a level of half-siblings or higher ( $r > 0.25$ ).

Overall genetic diversity as measured by heterozygosity and allelic richness was similar among all bays (Table 3). The estimated effective number of breeders for the sampled bays and LI overall were low (Table 4) ranging from 65–262 breeding individuals per bay and 966 overall. The L-mode shift test exhibited a non-bottlenecked distribution of alleles and the heterozygote excess test for bottlenecks was not significant ( $p < 0.98$ ). The m-ratios for the LI collection as a whole were generally high, whereas all loci but 3 (A441, J42 and WF12) exhibited moderate to low m-ratios within individual bays when using the entire range (R) of alleles found in all LI locations (Table 5). Large, significant discrepancies between expected and observed heterozygosities were detected at all loci in all bays (Table 1). Global Hardy-Weinberg testing of heterozygote deficiency were statistically significant at all bays ( $p < 0.001$  for all sample locations) and all loci ( $p = 0.00-0.0043$  except WF06,  $p = 0.7$ ).  $F_{IS}$  values over all loci were significantly different from zero and positive in all 6 bays, ranging from 0.169–0.283 (Figure 3). All loci except WF6 exhibited this pattern. The average

in-group relatedness  $r$  per bay ranged  $r = -0.052-0.004$ . 94% of all values of pairwise relatedness were  $r < 0.2$ . Average internal relatedness of individual fish was high, though highly variable (mean 0.229, s.d. 0.206) with a range of IR from  $-0.178-0.999$  (Figure 4). This pattern was common to all 6 bays (Figure 4). In addition, pairwise comparison of mean IR of sample location shows some significant differences (Table 6). Moriches and Napeague have significantly higher mean IR values than Cold Spring Pond, Hempstead and Jamaica Bay ( $p < 0.05$ ), while Shinnecock has a significantly higher mean IR value than Cold Spring Pond. The internal level of homozygosity (HL), i.e. the proportion of loci of an individuals' genotype that were homozygotes, ranged from  $HL = 0-1$ . The mean value of the internal homozygosity level of individuals as highest for Moriches and Napeague with  $HL = 0.414$  (std = 0.172) and  $HL = 0.427$  (std = 0.172), respectively, and lowest for Cold Spring Pond and Hempstead Bays ( $HL = 0.296$ , std = 0.168 and  $HL = 0.314$ , std = 0.166) indicating that on average 30–40% of an individuals' loci are homozygous.

**Table 2. Pairwise  $F_{ST}$  for all sample locations.**

|             | Cold Spring | Jamaica | Hempstead | Moriches | Napeague | Shinnecock |
|-------------|-------------|---------|-----------|----------|----------|------------|
| Cold Spring |             | 0.0104  | 0.004*    | 0.008    | 0.014**  | 0.005      |
| Jamaica     | 0.187       |         | 0.012     | 0.005    | 0.013    | 0.013*     |
| Hempstead   | 0.023       | 0.120   |           | 0.008    | 0.015*   | 0.009*     |
| Moriches    | 0.093       | 0.280   | 0.150     |          | 0.011**  | 0.002**    |
| Napeague    | 0.003       | 0.060   | 0.023     | 0.010    |          | 0.013**    |
| Shinnecock  | 0.387       | 0.027   | 0.037     | 0.010    | 0.007    |            |

$F_{ST}$  values are given above the diagonal and p-values are presented below the. Significant values before Bonferroni correction are indicated. Indicative adjusted nominal level (5%) for multiple comparisons is: 0.0033.

\*( $p < 0.05$ ).

\*\*( $p < 0.01$ ).

doi:10.1371/journal.pone.0066126.t002

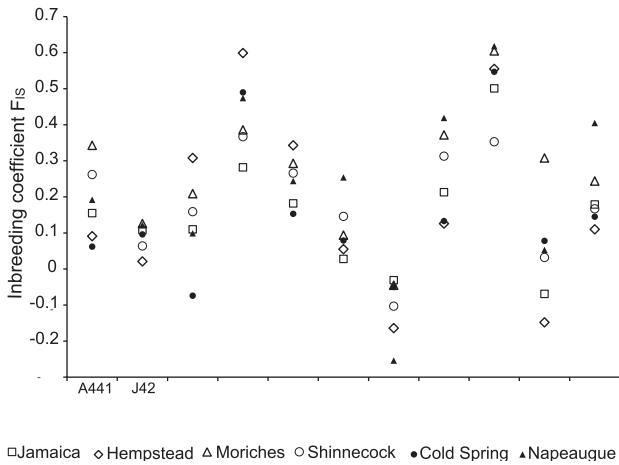

**Figure 3. Inbreeding coefficient  $F_{IS}$  for all sample locations per microsatellite locus.**  
doi:10.1371/journal.pone.0066126.g003

**Discussion**

Young of the year winter flounder living in New York estuaries exhibit relatively high genetic diversity in terms of microsatellite allelic richness, yet the low m-ratios observed suggest that rare alleles may have been lost within individual sample locations. Genetic diversity was weakly geographically partitioned between some of the bays, with distance between sites playing a small but significant role in driving this structure. All bays were out of HWE due to large excesses of homozygotes across 10 of 11 loci, leading to high inbreeding coefficients ( $F_{IS}$ ) in all bays. Many individuals also exhibited very high internal relatedness and individuals' genotypes exhibited a high proportion of homozygous loci. These patterns could not be explained by an artificial inflation of homozygosity resulting from technical issues. Large allelic dropout produces a pattern skewed towards homozygotes for small alleles, which did not occur in the LI winter flounder. If null alleles were at high enough frequencies at all loci to drive these patterns, we should have observed many null homozygotes (blanks for certain loci) when we had none. We would probably have also been able

**Table 3. Multi-locus genetic diversity for each sampling location (sample size N) and overall.**

| Location    | N   | $H_e$  | $H_o$  | A     |
|-------------|-----|--------|--------|-------|
| Cold Spring | 42  | 0.8255 | 0.701  | 16.18 |
| Hempstead   | 32  | 0.8264 | 0.656  | 14.09 |
| Jamaica     | 36  | 0.8248 | 0.6763 | 13.91 |
| Moriches    | 54  | 0.7995 | 0.5847 | 16.73 |
| Napeague    | 37  | 0.8013 | 0.5818 | 13.45 |
| Shinnecock  | 66  | 0.7968 | 0.6214 | 17.27 |
| LI          | 267 | 0.8174 | 0.6334 | 25.09 |

$H_e$  expected heterozygosity over all loci.  $H_o$ : observed heterozygosity over all loci. A: Allelic Richness (mean number of alleles per locus adjusted for sample size).  
doi:10.1371/journal.pone.0066126.t003

to amplify null alleles in homozygotes by lowering temperatures, but this did not occur. Inadvertent sampling of closely related individuals can also generate HWE deviations of this nature, but few (~6%) of the sampled young-of-the-year fish exhibited high relatedness ( $r > 0.25$ ) ruling out a Wahlund effect due to sampling of closely related individuals. A Wahlund effect due to undetected population structure is also unlikely, as no cryptic genetic structure within any of the bays was detected using STRUCTURE.

The most likely explanation for these large deviations in HWE is that inbreeding is occurring in LI winter flounder. Similar evidence for inbreeding has been documented in a wide variety of terrestrial and freshwater animals (e.g. wolves (*Canis lupus*) [57], deer (*Cervus elaphus*) [58], wasps (*Ancistrocerus antilope*) [59], brook trout (*Salvelinus fontinalis*) [60]), but relatively few marine fish populations can exhibit strong deviations from HWE (e.g., European anchovy (*Engraulis encrasicolus*) [15], whitefish (*Coregonus lavaretus lavaretus*) [20], rockfish (*Sebastes melanops*) [21]), including other flatfish and winter flounder in other regions [24,36,62–65]. In these studies excess homozygosity is generally attributed to technical or sampling artifacts and alternative biological explanations, such as inbreeding, are not explicitly tested. Our results and

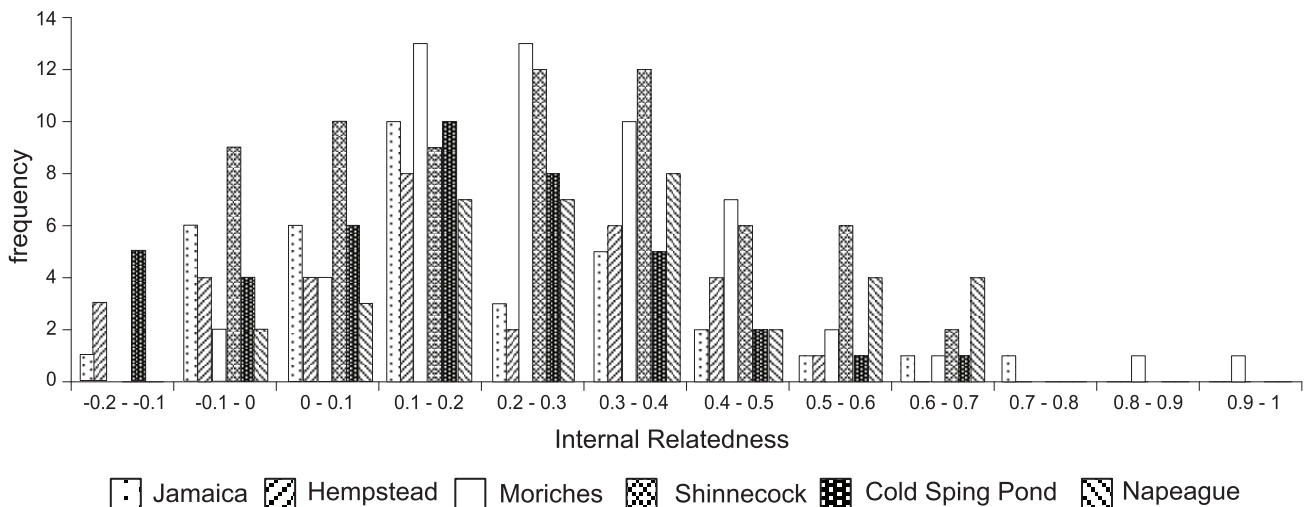

**Figure 4. Internal relatedness.** Frequency distribution of level of internal relatedness (IR) over all loci for all sample locations.  
doi:10.1371/journal.pone.0066126.g004



**Table 4.** Estimated effective number of breeders ( $N_b$ ) and 95% CI for all sample locations.

| Location    | $N_b$ | 95% CI        |
|-------------|-------|---------------|
| Cold Spring | 141.4 | 111.6, 190.6  |
| Hempstead   | 113.7 | 83.9, 173.3   |
| Jamaica     | 65.3  | 25.3, 166.3   |
| Moriches    | 262.5 | 189.0, 421.2  |
| Napeague    | 88.0  | 71.6, 112.8   |
| Shinnecock  | 289.7 | 219.9, 418.6  |
| LI Bays     | 966.1 | 808.1, 1195.0 |

doi:10.1371/journal.pone.0066126.t004

those of Hoarau et al. [17] suggest that inbreeding should be routinely considered as a potential cause of HWE deviation in heavily exploited marine fish. Loci with the largest deviations from equilibrium expectations are frequently discarded in studies of wild animal populations based on the assumption that they have null alleles [66]. While this is always a possibility, it is important to consider that biological explanations are also an option, especially if the deviations are chronic at multiple loci. This will enable rigorous testing of these alternative explanations and a less biased assessment of the magnitude and causes of HWE deviation in marine fish.

We propose the inbreeding observed in LI populations may be due a confluence of a small spawning population in each bay and a propensity of these fish to spawn in their natal estuary. It has generally been assumed that marine fish exhibit panmictic population structure and do not require management at the sub-population level [10]; however studies have shown that population structure is important in many species [9]. Previous research on LI proposes the existence of multiple distinct behavioral groups with observations indicating the presence of resident and migratory individuals termed “bay fish” and “offshore fish”, respectively [27,29,67]. Poole [67] estimated morphometric differences and variation in age and growth across four south shore bays of LI. It is not yet clear if these contingents are genetically differentiated [9,29], but if they are, then including individuals from both groups in the same analysis could cause heterozygote deficiencies relative to HWE expectations. However, this hypothesis is unlikely to explain the strong HWE deviations we observed. Bayesian clustering failed to detect any strongly differentiated groups that could correspond to “bay” and “offshore” contingents within bays and none of the young-of-the-year fish from different cohorts in the same year sampled in a given bay were genetically

differentiated from one another. Although we report small but significant  $F_{ST}$  along the south shore of LI and Peconic Bays and a weak pattern of IBD, these estimates of genetic differentiation are confounded by inbreeding at the individual level within the bays we sampled. Since there were significant differences in IR between bays we cannot assume that this bias is the same for each bay. More direct methods for assessing migration rates between bays (tagging, telemetry or otolith microchemistry) are needed to assess genetic differentiation between winter flounder in these bays.

We suggest that relatively few mature adults are contributing to each generation, resulting in a high proportion of related fish spawning with each other. Like any broadcast spawning species it is probable that there is large variation in reproductive success in this species due to high larval and pre-recruit mortality [35]. When spawning populations are large, inbreeding is unlikely even despite these characteristics. All recent indicators, however, show that spawning populations have reached extremely low levels in New York estuaries [29,68,69]. We have no direct evidence that spawning fish are related because sampled individuals were YOY rather than spawning adults. However, our estimates of effective number of breeders producing the cohorts we sampled were consistent with the premise that there are relatively few spawning adults in these bays, because all estimates were in the tens to hundreds of individuals. It is important to note that these estimates do not necessarily reflect the spawning population for the entire bay. They may only be representative of the parts of each bay that we sampled since bays were not sampled randomly and flounder are patchily distributed [29].

Inbreeding could directly contribute to the failure of some marine fish to recover from exploitation as it has been linked to lower survival and reproduction rates and lower resistance to disease and environmental stress [70] and can have a significant effect on extinction risk [71], with persistence time of inbred endangered species being reduced 17.5–28.5% [72]. Additionally, the effect of inbreeding depression is multiplied in a stressful environment [73]. A recent study by Bickley et al. [74] tested the effect of an endocrine disrupter (the fungicide clotrimazole) on reproduction on a model fish (zebrafish, *Danio rerio*) in a laboratory setting. They confirmed that inbreeding has a much stronger effect when combined with the exposure to a chemical stressor, resulting in lower embryo viability and few offspring. Western populations of winter flounder on LI, particularly those in Jamaica Bay, are exposed to anthropogenic habitat degradation, particularly large amounts of municipal sewage effluent which has been shown to contain estrogenic compounds [75,76]. Additionally there is evidence that winter flounder from Jamaica Bay demonstrate signs of endocrine disruption linked to the estrogenic compounds found there [77]. This environmental degradation of LI bays

**Table 5.** M-ratio calculated for all loci and sample location and overall sample locations.

|            | A441 | J42  | Pam21 | Pam79 | Pam27 | WF12 | WF6  | WF33 | WF32 | WF16 | WF27 |
|------------|------|------|-------|-------|-------|------|------|------|------|------|------|
| Jamaica    | 0.47 | 0.89 | 0.33  | 0.67  | 0.41  | 0.5  | 0.58 | 0.46 | 0.2  | 0.39 | 0.23 |
| Hempstead  | 0.71 | 0.74 | 0.33  | 0.29  | 0.41  | 0.83 | 0.66 | 0.43 | 0.29 | 0.47 | 0.37 |
| Moriches   | 0.76 | 0.89 | 0.61  | 0.62  | 0.67  | 0.5  | 0.5  | 0.46 | 0.27 | 0.42 | 0.37 |
| Shinnecock | 0.65 | 0.84 | 0.61  | 0.57  | 0.52  | 0.83 | 0.67 | 0.46 | 0.34 | 0.36 | 0.5  |
| Cold Spr   | 0.65 | 0.95 | 0.5   | 0.52  | 0.52  | 0.83 | 0.67 | 0.42 | 0.22 | 0.44 | 0.45 |
| Napeague   | 0.76 | 0.68 | 0.44  | 0.45  | 0.52  | 0.83 | 0.5  | 0.34 | 0.2  | 0.36 | 0.33 |
| overall    | 1    | 1    | 1     | 0.83  | 0.81  | 1    | 0.75 | 0.74 | 0.46 | 0.72 | 0.7  |

doi:10.1371/journal.pone.0066126.t005

**Table 6.** Pairwise comparison of mean Internal Relatedness (IR) values per bay.

| Average IR         | Cold Spring   | Hempstead     | Jamaica       | Morriches     | Napeague      | Shinnecock    |
|--------------------|---------------|---------------|---------------|---------------|---------------|---------------|
| <b>Cold Spring</b> | <b>0.1532</b> | 0.5588        | 0.4461        | 0.0011        | 0.0015        | 0.0351        |
| <b>Hempstead</b>   | NS            | <b>0.1801</b> | 0.8488        | 0.0176        | 0.0164        | 0.2082        |
| <b>Jamaica</b>     | NS            | NS            | <b>0.1900</b> | 0.0393        | 0.0340        | 0.3293        |
| <b>Morriches</b>   | **            | *             | *             | <b>0.2883</b> | 0.7956        | 0.1388        |
| <b>Napeague</b>    | **            | *             | *             | NS            | <b>0.2995</b> | 0.1169        |
| <b>Shinnecock</b>  | *             | NS            | NS            | NS            | NS            | <b>0.2342</b> |

Bolded values on the diagonal are the mean IR values of individuals sampled at the designated location, p-values of pairwise t-test are shown above the diagonal and significance level before Bonferroni correction is below the diagonal.

\*p<0.05.

\*\*p<0.01.

NS = not significant.

doi:10.1371/journal.pone.0066126.t006

combined with inbreeding depression may contribute to the ongoing recruitment failure of winter flounder and should be further investigated.

Marine fish have historically been managed without an underlying concern that populations could be reduced to the point where they would become vulnerable to local extinction and processes that reduce their genetic diversity. We show that the effective number of breeders is so low in some parts of the winter flounder range that it is able to be estimated using genetic approaches that work most effectively for small populations. Although we observe only weak evidence of a genetic bottleneck at this stage, the number of spawning adults is sufficiently low for inbreeding to be occurring. Given similar findings in genetic studies of North Sea plaice [17] and evidence of local population structure in other species, we suggest that resource managers

should consider the possibility that exploited marine fish are vulnerable to local extinction and inbreeding.

## Acknowledgments

We would like to thank James Browne and the Town of Hempstead Dept. of Conservation & Waterways and the Marine Nature Study Center, the Town of East Hampton Dept. Natural Resources and SoMAS Vessel Operations for assistance during field sampling.

## Author Contributions

Conceived and designed the experiments: LAH MGF AEM MDF DDC SJO. Performed the experiments: SJO KAF LAH. Analyzed the data: SJO KAF. Contributed reagents/materials/analysis tools: LAH MGF AEM DDC KAF. Wrote the paper: SJO DDC LAH MGF.

## References

- McNeely JA, Miller KRW, Reid WV, Mittermeier RA, Werner TB (1990) Conserving the world's biological diversity. International Union for Conservation of Nature and Natural Resources, World Resources Institute, Conservation International, World Wildlife Fund-US, and the World Bank, Gland, Switzerland, and Washington, D.C.
- Kenchington E, Heino M (2002) Maintenance of genetic diversity: challenges for management of marine resources. *ICES Journal of Marine Science* Y:13: 1–14.
- Frankham RK, Lees M, Montgomery PR, England EH, Lowe EH, et al. (1999) Do population size bottlenecks reduce evolutionary potential? *Anim Conserv*, 2:255–260.
- Willi YJ, Van Buskirk J, Hoffmann AA (2006) Limits to the adaptive potential of small populations. *Annu Rev Ecol S*, 37: 433–458.
- Allendorf FW (1986) Genetic drift and the loss of alleles versus heterozygosity. *Zoo Biol*, 5: 181–190.
- Frankham R (1996) Relationship of Genetic Variation to Population Size in Wildlife. *Conserv Biol*, 10: 1500–1508.
- Lacy RC (1987) Loss of genetic diversity from managed populations: Interacting effects of drift, mutation, immigration, selection, and population subdivision. *Conserv Biol*, 1: 143–158.
- Cowen RK, Sponaugle S (2009) Larval dispersal and marine population connectivity. *Annu Rev Mar Sci*, 1: 443–446.
- Frisk MG, Jordaan A, Miller TJ (2013) Moving beyond the current paradigm in marine population connectivity: are adults the missing link? *Fish Fish*, doi: 10.1111/faf.12014
- Snedbol RK, McPherson A, Hansen MM, Kenchington E (2002) Myths and moderation in marine 'metapopulations?'. *Fish Fish*, 3: 20–35.
- Ward RD, Woodwark M, Skibinski DOF (1994) A comparison of genetic diversity levels in marine, freshwater, and anadromous fishes. *J Fish Biol*, 44: 213–232.
- Poulsen NA, Nielsen EE, Schierup MH, Loeschcke V, Groenjaer P (2006) Long-term stability and effective population size in North Sea and Baltic Sea cod (*Gadus morhua*). *Mol Ecol*, 15: 321–331.
- Thorrold SR, Latkoczy C, Swart PK, Jones CM (2001) Natal homing in a marine fish metapopulation. *Science*, 291: 297–299.
- Wang C, Yu X, Tong J (2007) Microsatellite diversity and population genetic structure of redfin culter (*Culter erythropterus*) in fragmented lakes of the Yangtze River. *Hydrobiologica*, 586: 321–329.
- Zarraonaindia I, Pardo MA, Iriondo M, Manzano C, Estonba A (2009) Microsatellite variability in European anchovy (*Engraulis encrasicolus*) calls for further investigation of its genetic structure and biogeography. *International council for the exploration of the sea (ICES)*.
- Hauser L, Adcock GJ, Smith PJ, Bernal-Ramirez JH, Carvalho GR (2002) Loss of microsatellite diversity and low effective population size in an overexploited population of New Zealand snapper (*Pagrus auratus*). *PNAS*, 99(18): 1142–1147.
- Hoarau G, Boon E, Jongma DN, Ferber S, Palsson J, Van der Veer HK, et al. (2004) Low effective population size and evidence for inbreeding in an overexploited flatfish, plaice (*Pleuronectes platessa* L.). *P R Soc B*, 272(1562): 497–503.
- Turner TF, Osborne MJ, Moyer GR, Benavides MA, Alo D (2006) Life history and environmental variation interact to determine effective population to census size ratio. *P R Soc B*, 273(1605): 3065–3073.
- Lotterhos KE, Markel RW (2012) Oceanographic drivers of offspring abundance may increase or decrease reproductive variance in a temperate marine fish. *Mol Ecol*, 21: 5009–5026.
- McCairns RJS, Kuparinen A, Panda B, Jokikokko E, Merila J (2012) Effective size and genetic composition of two exploited, migratory whitefish (*Coregonus lavaretus lavaretus*) populations. *Conserv Genet*, 13(6):1409–1520
- Buckley J (1989) Species profiles: life histories and environmental requirements of coastal fishes and invertebrates (North Atlantic) - winter flounder. *US Fish Wildl Serv Biol Rep*, 82(11.87). U.S. Army Corps of Engineers, TR EL-82-84.
- Hendrickson L, Nietschke P, Terceiro M (2006) Status of Fishery Resources off the Northeastern US - Winter Flounder. NEFSC - Resource Evaluation and Assessment Division.
- McCracken FD (1963) Seasonal movements of the winter flounder, *Pseudopleuronectes americanus* (Wahlbaum), on the Atlantic Coast. *Journal of Fisheries Research Board of Canada*, 20(2): 551–586.
- McClelland G, Melendy J, Osborne J, Reid D, Douglas S (2005) Use of parasite and genetic markers in delineating populations of winter flounder from the central and south-west Scotian Shelf and north-east Gulf of Maine. *J Fish Biol*, 66(4): 1082–1100.

25. Chant RJ, Curran MC, Able KW, Glenn SM (2000) Delivery of Winter Flounder (*Pseudopleuronectes americanus*) larvae to settlement habitats in coves near tidal inlets. *Estuar Coast Shelf Sci*, 51(5): 529–541.
26. Buckley L, Collie J, Kaplan LAE, Crivello J (2008) Winter Flounder Larval Genetic Population Structure in Narragansett Bay, RI: Recruitment to Juvenile Young-of-the-Year. *Estuar Coast*, 31: 745–754.
27. Lobell MJ (1939) A biological survey of the salt waters of Long Island, 1938. Report on certain fishes. Winter Flounder (*Pseudopleuronectes americanus*). 28<sup>th</sup> Ann Rep NY St Cons Dept, Suppl., Pt. 1, pp. 63–90.
28. Perlmutter A (1947) The blackback flounder and its fishery in New England and New York. Bulletin of the Bingham Oceanographic Collection, 11(2), pp. 1–92.
29. Sagarese SR, Frisk MG (2011) Movement patterns and residence of adult winter flounder within a Long Island estuary. *Mar Coast Fish*, 3(1): 295–306.
30. van Guelpen L, Davis CC (1979) Seasonal movements of the Winter Flounder, *Pseudopleuronectes americanus*, in two contrasting inshore locations in Newfoundland. *T Am Fish Soc*, 108(1): 26–37.
31. Wuenschel MJ, Able KW, Byrne D (2009) Seasonal patterns of winter flounder, *Pseudopleuronectes americanus*, abundance and reproductive condition on the New York Bight continental shelf. *J Fish Biol*, 74: 1508–1524.
32. NMFS (National Marine Fisheries Service) (2007) Annual Commercial landing statistics, NOAA Fisheries, Office of Science and Technology, Fisheries Statistics and Economics, Washington, DC URL: [http://www.st.nmfs.noaa.gov/st1/commercial/landings/annual\\_landings.html](http://www.st.nmfs.noaa.gov/st1/commercial/landings/annual_landings.html).
33. Northeast Fisheries Science Center (2011) 52nd Northeast Regional Stock Assessment Workshop (52nd SAW) Assessment Report. NEFSC Ref Doc 11-17; 962 p. Available from: National Marine Fisheries Service, 166 Water Street, Woods Hole, MA 02543-1026, or online at <http://nefsc.noaa.gov/publications>.
34. Buckley J, Smigielski AS, Halavik TA, Caldaroni EM, Burns BR, et al. (1991) Winter flounder, *Pseudopleuronectes americanus*, reproductive success. I. Among-location variability in size and survival of larvae reared in the laboratory. *Mar Ecol Prog Ser*, 74: 117–124.
35. DeLong AK, Collie JS, Meise CJ, Powell JC. (2001) Estimating growth and mortality of juvenile winter flounder, *Pseudopleuronectes americanus*, with a length-based model. *Can J Fish Aquat Sci*, 58: 2233–2246.
36. Crivello JF, Danila DJ, Lorda E, Keser M, Roseman EF (2004) The genetic stock structure of larval and juvenile winter flounder larvae in Connecticut waters of eastern Long Island Sound and estimations of larval entrainment. *J Fish Biol*, 65: 62–76.
37. O'Leary SJ, Feldheim KA, Chapman DC (2013) Novel microsatellite loci for winter flounder (*Pseudopleuronectes americanus*). *Conserv Genet Resources*. DOI 10.1007/s12686-012-9854-8.
38. Park SDE (2001) Trypanotolerance in West African Cattle and the Population Genetic Effects of Selection. PhD Thesis University of Dublin.
39. Nei M (1978). Estimation of average heterozygosity and genetic distance from a small number of individuals. *Genetics*, 9:583–590.
40. Goudet J (1995) FSTAT (Version 1.2): A computer program to calculate F-statistics. *J Hered*, 86(6): 485–486.
41. Raymond M, Rousset F (1995) GENEPOP (version 1.2): population genetics software for exact tests and ecumenicism. *Heredity*, 86: 2480249.
42. Rousset F (2008) GENEPOP'007: a complete reimplementation of the Genepop software for Windows and Linux. *Mol Ecol Resources*, 8: 103–106.
43. Slatkin M (1995) A measure of population subdivision based on microsatellite allele frequencies. *Genetics*, 139(1): 457–462.
44. Mantel N (1967) The detection of disease clustering and a generalized regression approach. *Cancer Res*, 27: 209.
45. Jensen JL, Bohonak AJ, Kelley ST (2005) Isolation by distance, web service. *BMC Genetics*, 6:13.
46. Pritchard JK, Stephens M, Donnelly P (2000) Inference of population structure using multilocus genotype data. *Genetics*, 155: 945–959.
47. Latch EK, Dharmarajan G, Glaubitz JC, Rhodes OE (2006) Relative performance of Bayesian clustering software for inferring population substructure and individual assignment at low levels of population differentiation. *Conserv Genet*, 7(2): 295–302.
48. Waples RS (2006) A bias correction for estimates of effective population size based on linkage disequilibrium at unlinked gene loci. *Conserv Genet*, 7(2):167–184.
49. Waples RS, Do C, (2008) LDNE: a program for estimating effective population size from data on linkage disequilibrium. *Mol Ecol Resources*, 8: 753–756.
50. Robinson JD, Moyer GR (2012) Linkage disequilibrium and effective population size when generations overlap. *Evol Appl*. doi: 10.1111/j.1752-4571.2012.00289.x
51. Garza JC, Williamson EG (2001) Detection of reduction in population size using data from microsatellite loci. *Mol Ecol*, 10: 305–318.
52. Luikart G, Allendorf FW, Cornuet JM, Sherwin WB (1998) Distortion of allele frequency distributions provides a test for recent population bottlenecks. *J Hered* 89 (3): 238–247.
53. Piry S, Luikart G, Cornuet JM (1999) BOTTLENECK: a computer program for detecting recent reductions in the effective population size using allele frequency data. *J Hered*, 90: 502–503.
54. Wright S (1984) Evolution and the genetics of populations. Chicago: University of Chicago Press.
55. Amos W, Worthington WJ, Fullard K, Burg TM, Croxall JP, et al. (2001) The influence of parental relatedness on reproductive success. *P R Soc B*, 68(1480): 2021–2027.
56. Frasier TR (2008) STORM: software for testing hypotheses of relatedness and mating patterns. *Mol Ecol Resources*, 8: 1263–1266.
57. Liberg O, Andren H, Pedersen HC, Sand H, Sejberg D, et al. (2005) Severe inbreeding depression in a wild wolf *Canis lupus* population. *Biol Letters*, 1: 17–20.
58. Slate J, Kruuk LEB, Marshall TC, Pemberton JM, Clutton-Brock TH (2000) Inbreeding depression influences lifetime breeding success in a wild population of red deer (*Cervus elaphus*). *P R Soc B*, 267: 1657–1662.
59. Chapman TW, Stewart C (1996) Extremely high levels of inbreeding in a natural population of the free-living wasp *Ancistrocerus antilope* (Hymenoptera: Vespidae: Eumeniidae). *Heredity*, 76: 65–69.
60. Castric V, Bernatchez L, Belkhir K, Bonhomme F (2002) Heterozygote deficiencies in small lacustrine populations of brook charr *Salvelinus Fontinalis Mitchell* (Pisces, Salmonidae): a test of alternative hypotheses. *Heredity*, 89: 27–35.
61. Langen K, Schwarzer J, Kullmann H, Bakker TCM, Thunken T (2011) Microsatellite support for active inbreeding in a cichlid fish. *PLOS One*, 6(9): 1–9.
62. Anderson JD, Karel WJ (2012) Population Genetics of Southern Flounder with Implications for Management. *N Am J Fish Manag*, 32(4): 656–662.
63. Dongdong X, Sanlei LI, Bao L, Yurong Z, Wei Z, et al. (2012) Genetic diversity in two Japanese flounder populations from China seas inferred using microsatellite markers and COI sequences. *Chin J Oceanol Limn*, 30(4): 604–610.
64. Florin AB, Höglund J (2008) Population structure of flounder (*Platichthys flesus*) in the Baltic Sea: differences among demersal and pelagic spawners. *Heredity*, 101: 27–38.
65. Hemmer-Hansen J, Nielsen EEG, Gronkjaer P, Loeschke V (2007) Evolutionary mechanisms shaping the genetic population structure of marine fisheries; lessons from the European flounder (*Platichthys flesus* L.). *Mol Ecol*, 16: 3104–3118.
66. Dharmarajan G, Beatty WS, Rhodes Jr OE (2012) Heterozygote deficiencies caused by a Wahlund effect: Dispelling unfounded expectations. *J Wildlife Manage*, 77: 226–234
67. Poole JC (1966) Growth and age of winter flounder in four bays of Long Island. *New York Fish Game J*, 13:206–220.
68. Yencho MA (2009) Abundance, mortality, age and growth of young of the year winter flounder (*Pseudopleuronectes americanus*) in two locations on Long Island. Master's Thesis.
69. Socrates JB (2006) A study of the Striped Bass in the Marine District of New York State. New York State Department of Environmental Conservation, East Setauket, NY. Completion Report for Project AFC-30.
70. Keller IF, Waller DM (2002) Inbreeding effects in wild populations. *Trends Ecol Evol*, 17:230–241.
71. O'Grady JJ, Brook BW, Reed DH, Ballou JD, Tonkyn DW, et al. (2006) Realistic levels of inbreeding depression strongly affect extinction risk in wild populations. *Biol Conserv*, 133(1): 42–51.
72. Liao W, Reed DH (2009) Inbreeding – environment interactions increase extinction risk. *Anim Conserv*, 12: 54–61.
73. Armbruster P, Reed DH (2005) Inbreeding depression in benign and stressful environments. *Heredity*, 95, 235–242.
74. Bickley LK, Brown AR, Hosken DJ, Hamilton PB, Le Page G, et al. (2012) Interactive effects of inbreeding and endocrine disruption on reproduction in a model laboratory fish. *Evol Appl* doi: 10.1111/j.1752-4571.2012.00288.x
75. Ferguson PL, Iden CR, McElroy AE, Brownawell BJ (2001) Determination of steroid estrogens in wastewater by immunoaffinity extraction coupled with HPLC-MS. *Anal Chem*, 73(1): 3890–3895.
76. Todorov JR, Elskus AA, Schlenk D, Ferguson PL, Bronawell BJ, et al. (2002) Estrogenic responses of larval sunshine bass (*Morone saxatilis* × *M. chrysops*) exposed to New York City sewage effluent. *Mar Environ Res*, 54(3–5): 691–695.
77. Mena L, Arukwe A, Deslow D, McElroy A (2006) Endocrine disruption in winter flounder (*Pseudopleuronectes americanus*) from an urban estuary, Jamaica Bay, NY USA. *Mar Environ Res*, 62:S223–S234.
